# Supplementary material
Source: HighWire-hosted journal article supplement (https://mh.bmj.com/content/50/1/1)
Supplement: inline-supplementary-material-1 [file inline-supplementary-material-1.pdf]

## HOSTILE ENVIRONMENT

There will be shouting  
there will be swearing  
there will be anger

If you cut me do I not bleed?

When they shout go back  
to where you came from  
Do they not understand  
the fractures are in  
space-time continuum  
What ignorance of their own - our  
own shared histories, presents &  
futures.

There will be fear turning to  
anger turning to fear turning to  
words.  
words turning to rants - rants -  
of course.  
of course I rant. Rant is  
in my name.  
I'm in g-Rant.

(No relation to Hugh G-Rant!)
