# Supplementary material
Source: HighWire-hosted journal article supplement (https://mh.bmj.com/content/50/1/1)
Supplement: inline-supplementary-material-2 [file inline-supplementary-material-2.pdf]

## HOSTILE ENVIRONMENT

P. 115.

If

If your normal is

People dying of Hunger while food  
wastes away on shelves/homes lying  
empty when humanity freezes to Death.

If your normal is

People dying to uphold artificial  
lines/people drowning in oceans/  
Us burning away the surface of our  
planet.

If your normal is this.  
Give Me  
Madness

If you think about it, Normality is  
Pretty Mad itself
